# Supplementary material for: Ultrasonographical Evaluation of the Median Nerve Mobility in Carpal Tunnel Syndrome: A Systematic Review and Meta-Analysis
Source: MDPI journal article supplement (doi:10.3390/diagnostics12102349), 2022-09-28
Supplement: s1 [file s1]

## Appendices

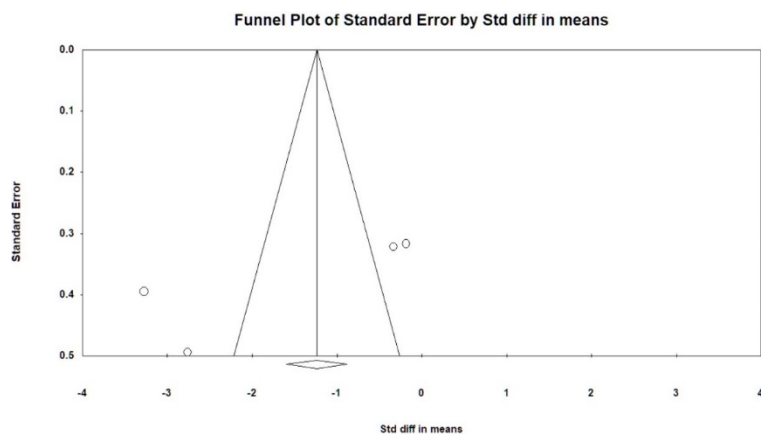

**Supplementary Figure S1.** Funnel plots of studies investigating actual transverse MN displacement.

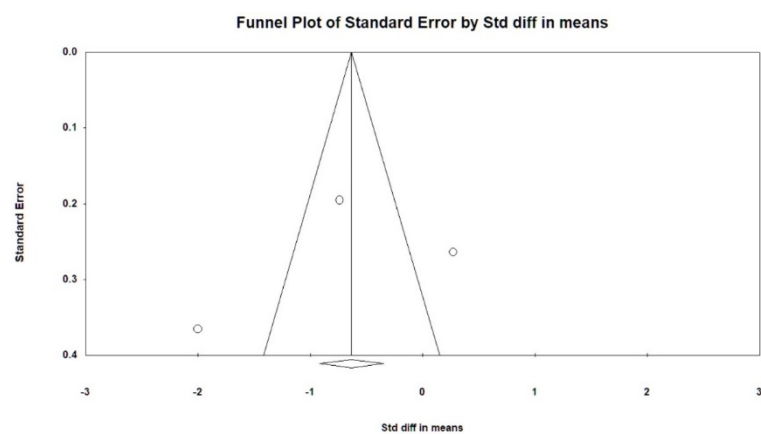

**Supplementary Figure S2.** Funnel plots of studies investigating transverse MN displacement at DP axis.

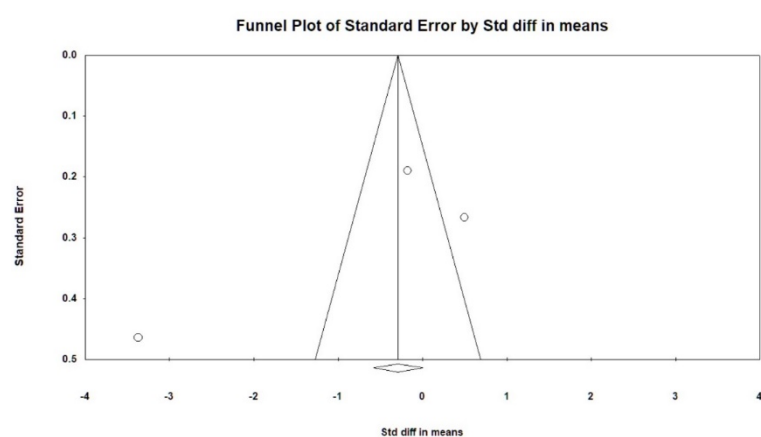

**Supplementary Figure S3.** Funnel plots of studies investigating transverse MN displacement at RU axis.

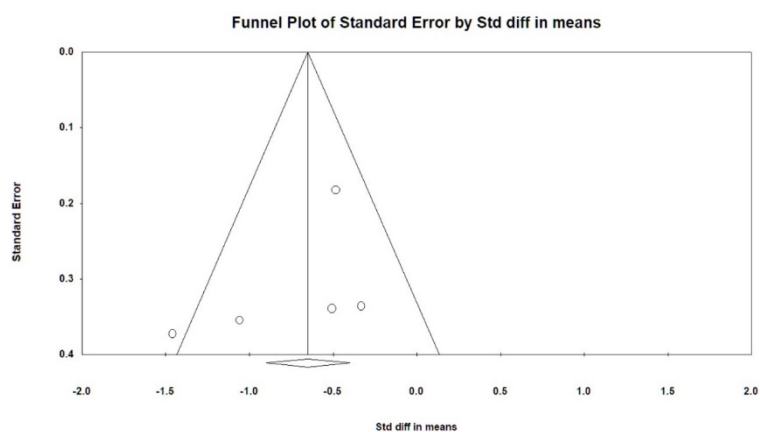

**Supplementary Figure S4.** Funnel plots of studies investigating longitudinal MN gliding, speckle tracking method.

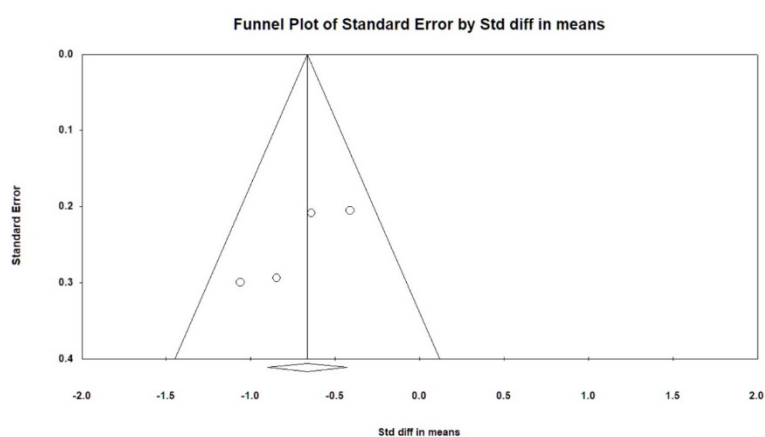

**Supplementary Figure S5.** Funnel plots of studies investigating longitudinal MN gliding, duplex Doppler waveform method.

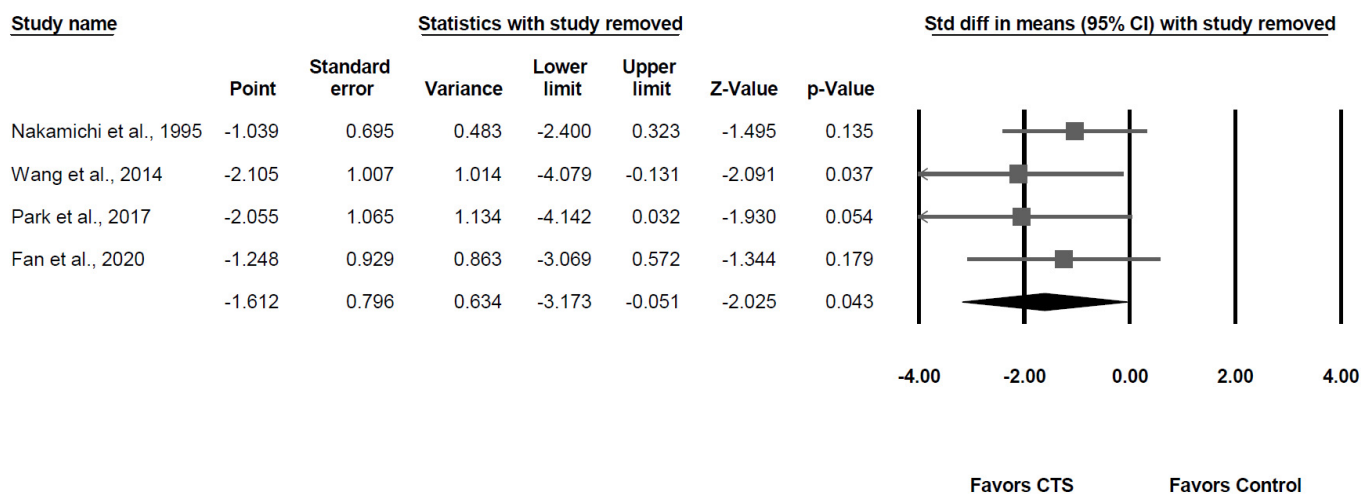

**Supplementary Figure S6.** The sensitivity analysis of studies evaluating actual transverse MN displacement.

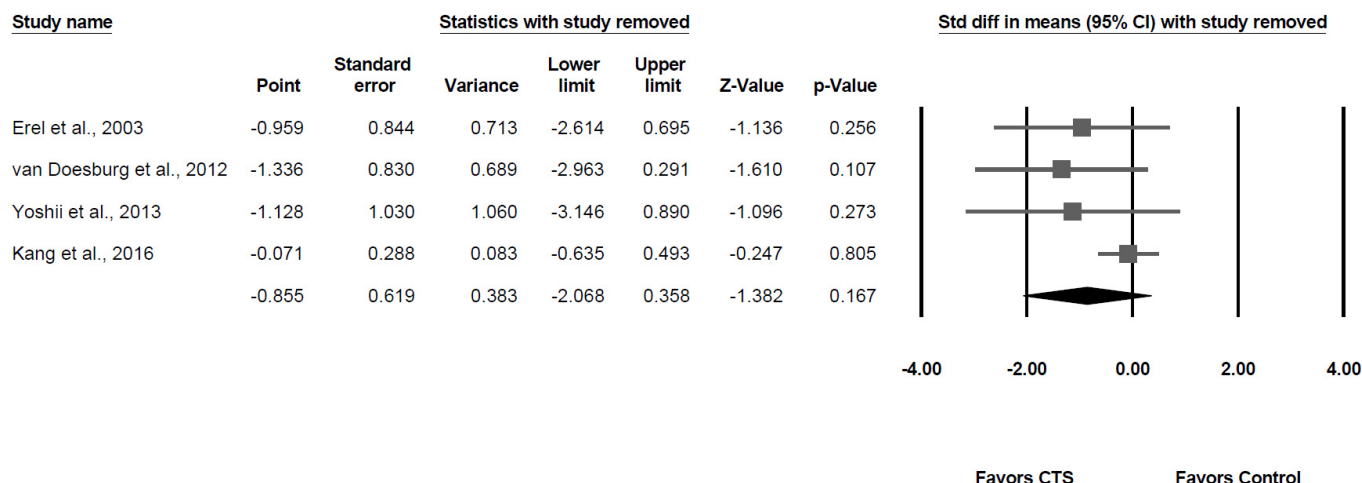

**Supplementary Figure S7.** The sensitivity analysis of studies evaluating transverse MN displacement at DP axis.

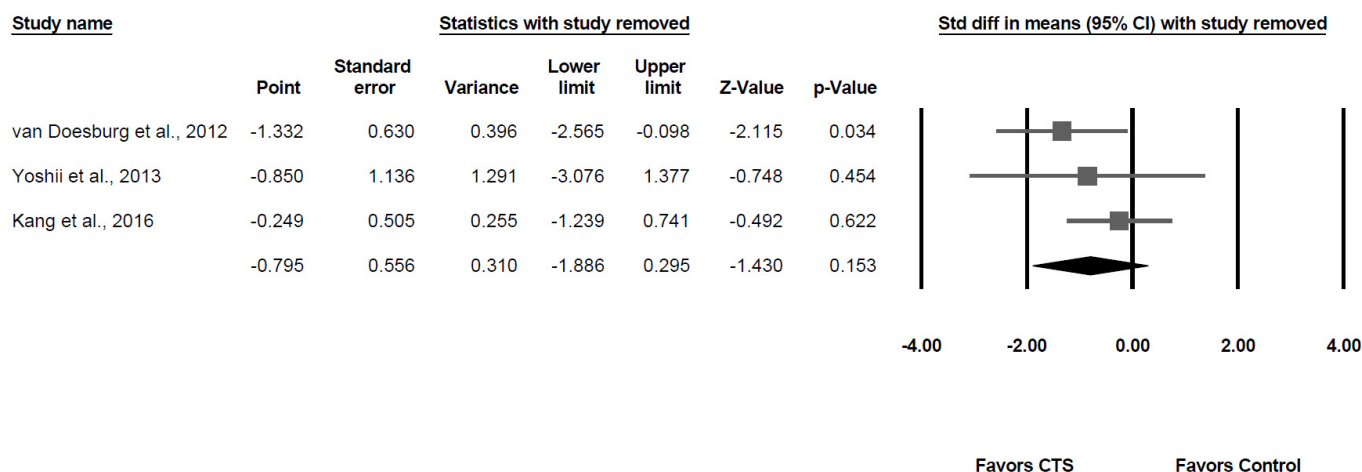

**Supplementary Figure S8.** The sensitivity analysis of studies evaluating transverse MN displacement at RU axis.

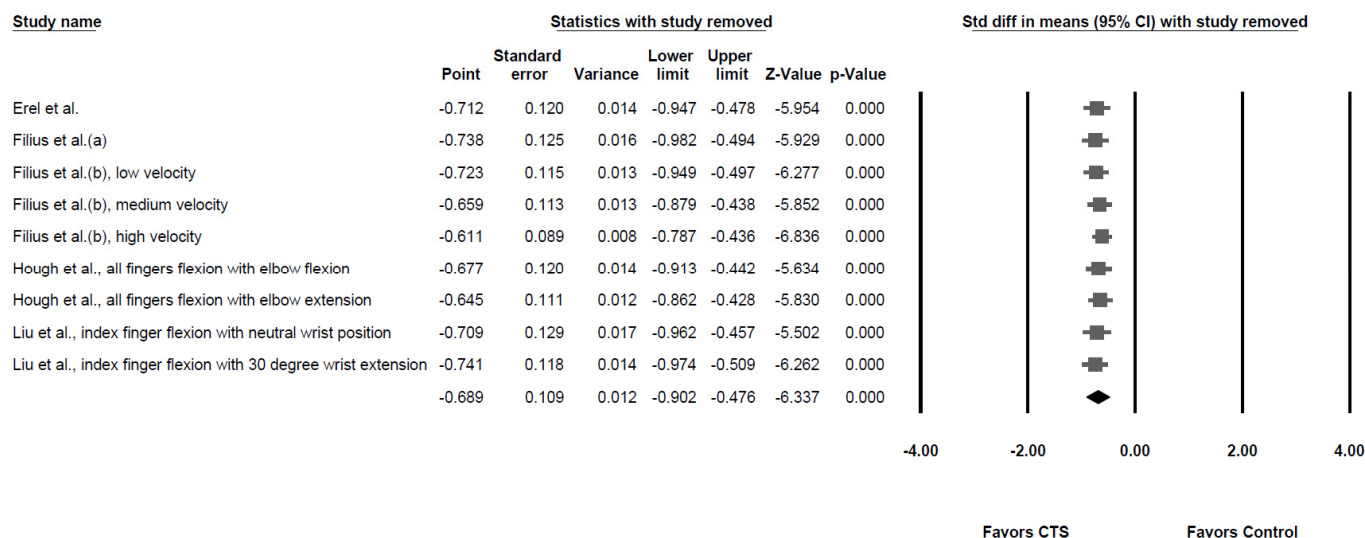

**Supplementary Figure S9.** The sensitivity analysis of studies evaluating longitudinal gliding.
